# Supplementary material for: Posterior fossa ependymoma H3 K27-mutant: an integrated radiological and histomolecular tumor analysis
Source: PubMed Central journal article supplement (PMC9476256; doi:10.1186/s40478-022-01442-4), 2022-09-14

### Case #1

#### Copy number prediction

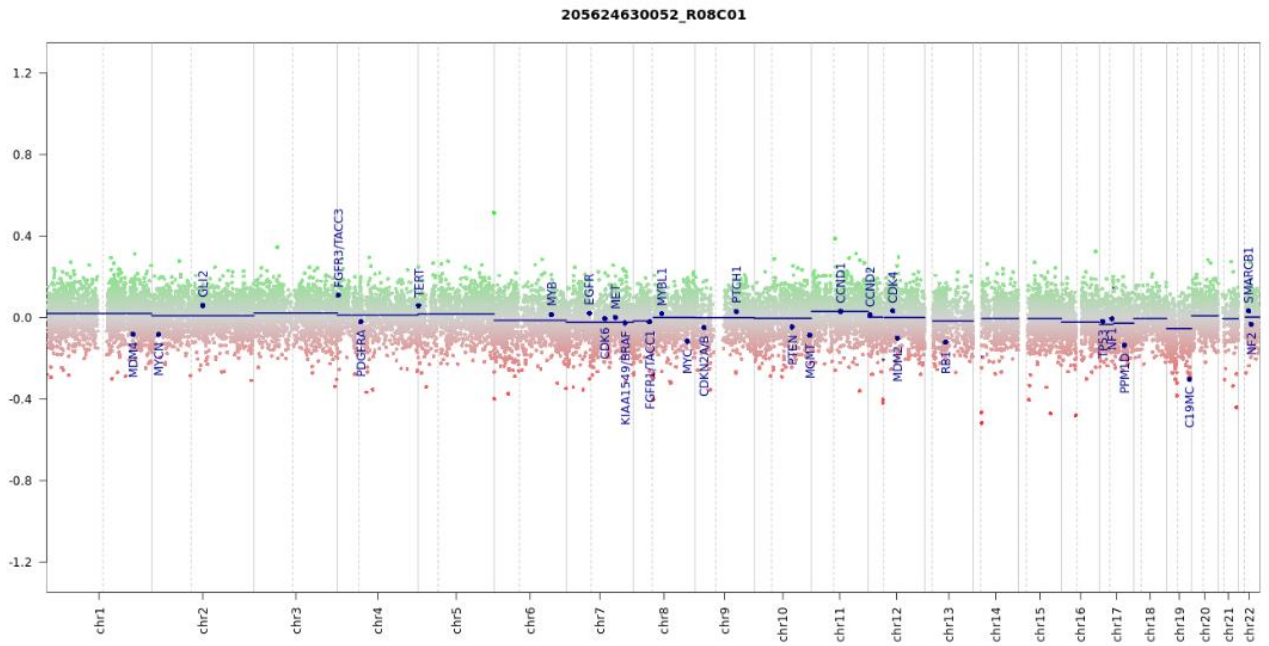

### Case #2

#### Copy number prediction

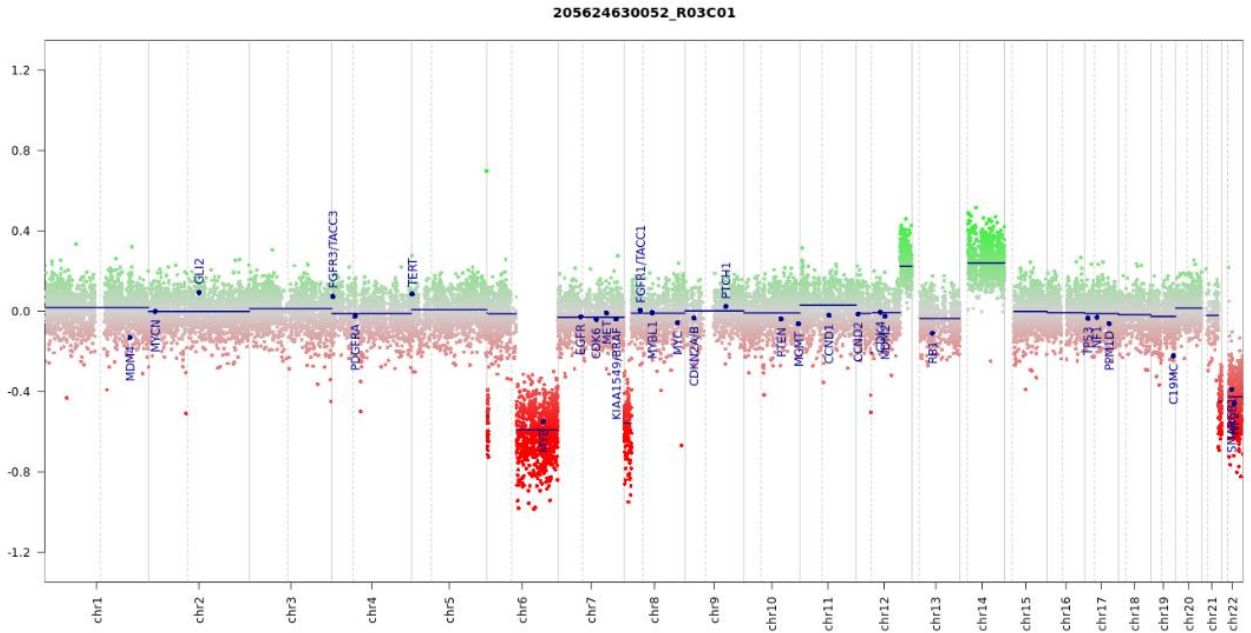

### Case #3

### Copy number prediction

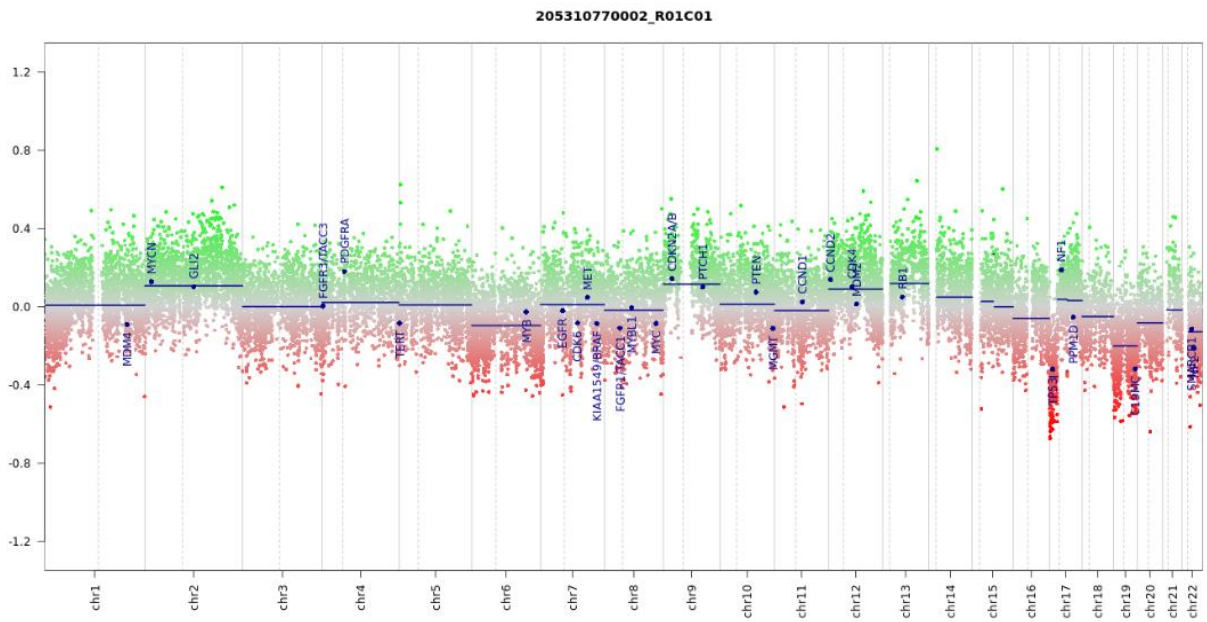

### Case #4

### Copy number prediction

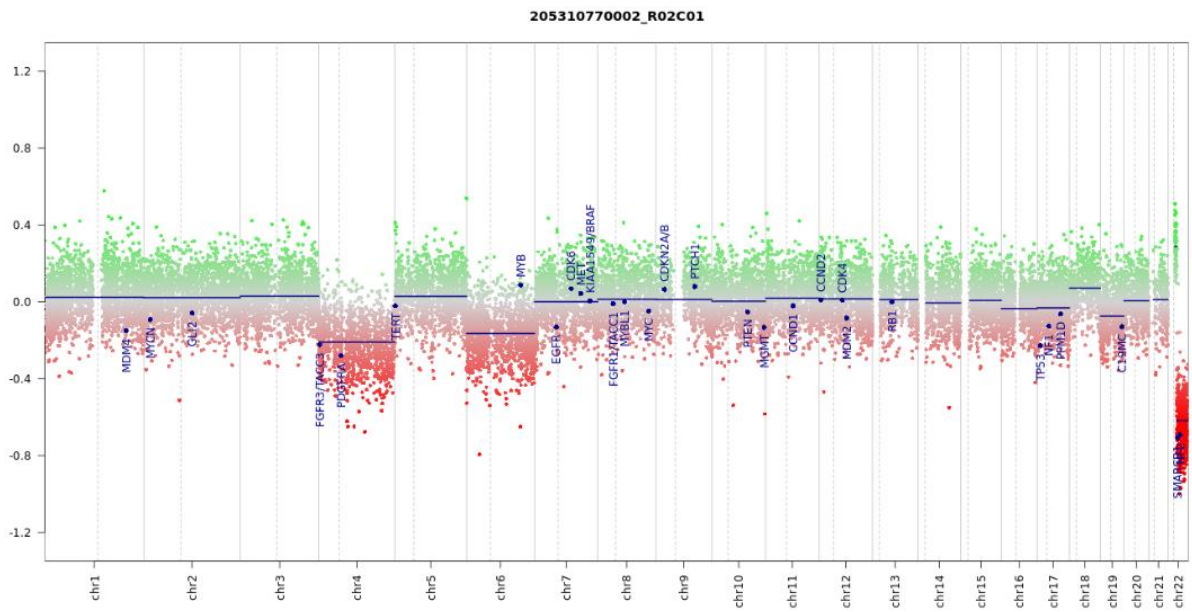

### Case #5

### Copy number prediction

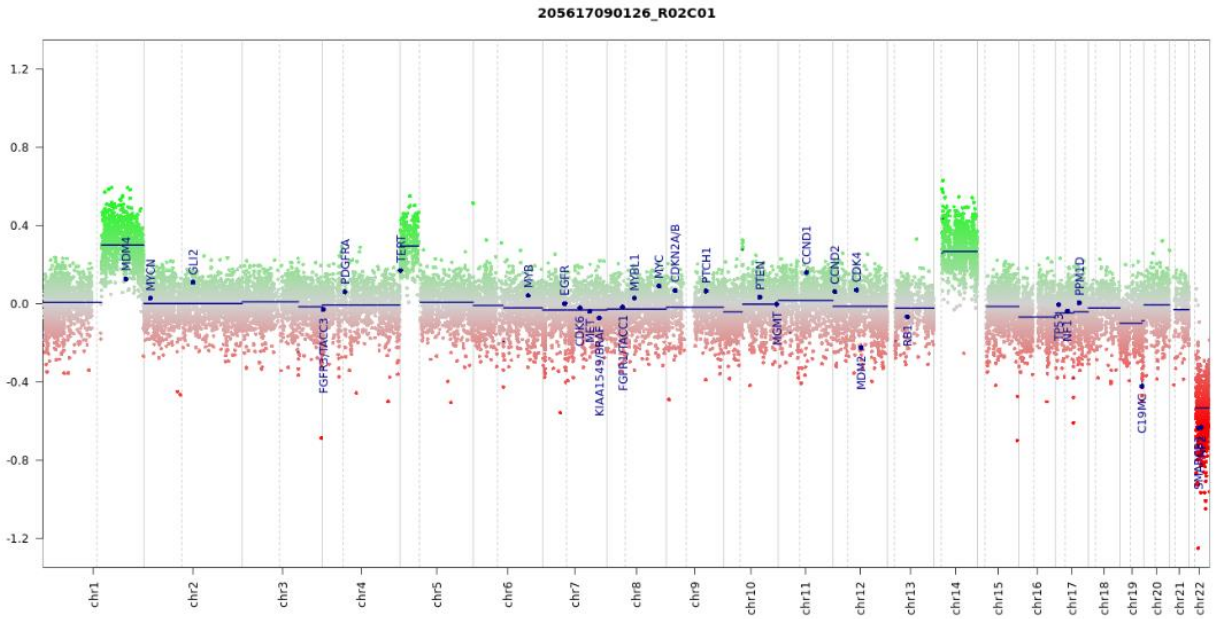

### Case #6

### Copy number prediction

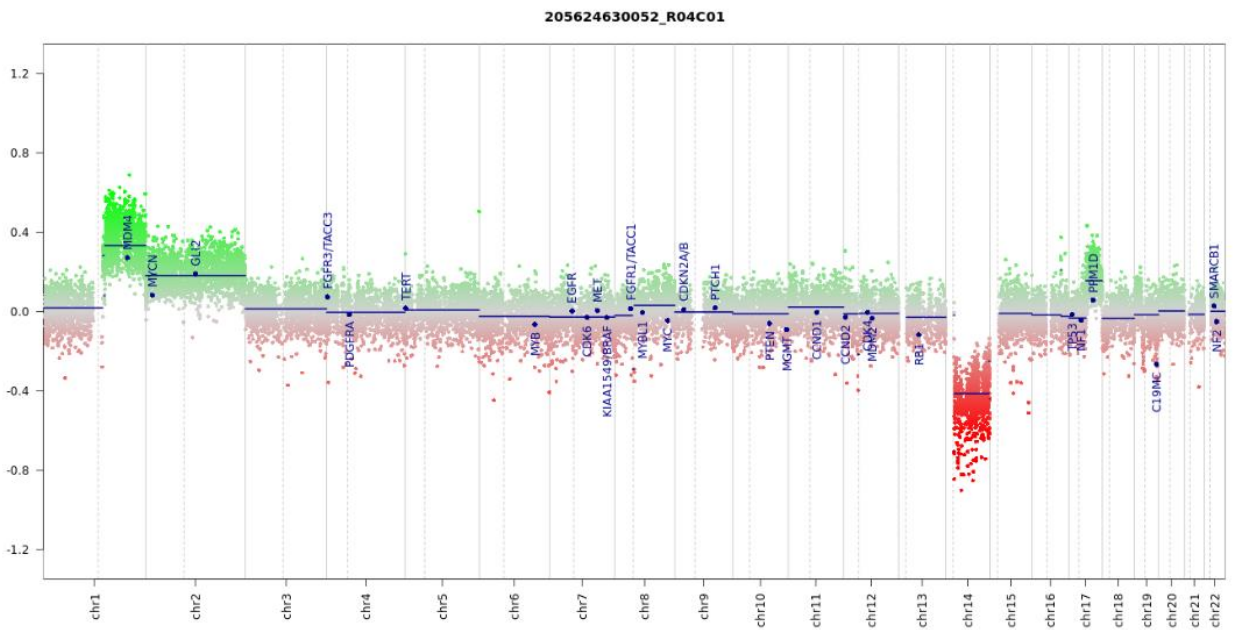

### Case #7

Copy number prediction

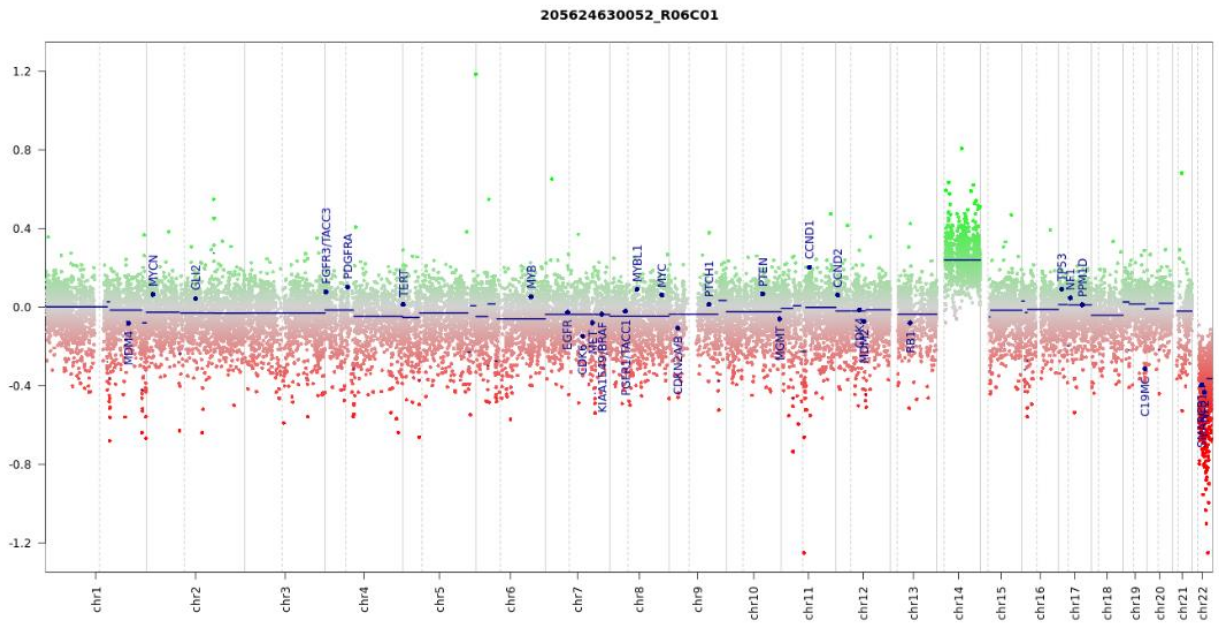

Case #8

Copy number prediction

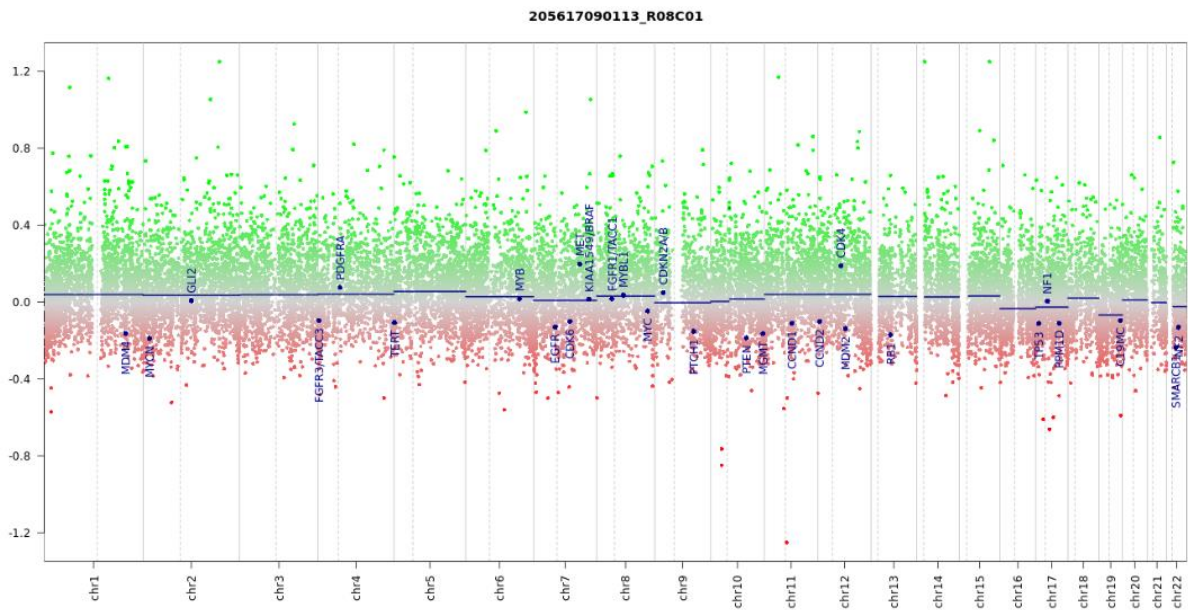

Case #9



# Copy number prediction

204425710136\_R06C01

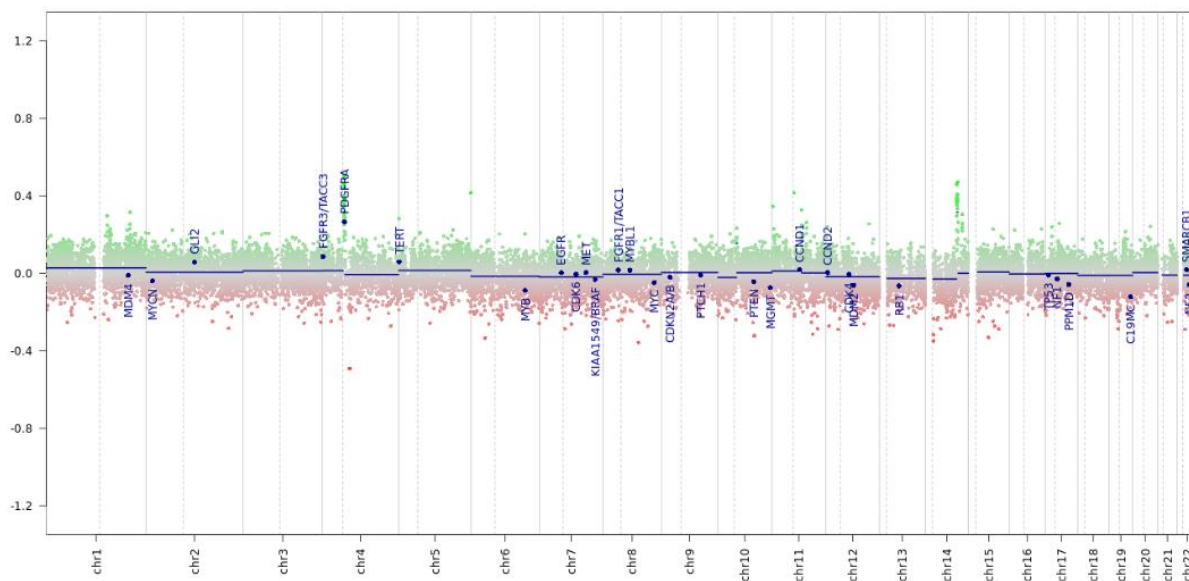

Supplement: 40478_2022_1442_MOESM1_ESM.pdf [file 40478_2022_1442_MOESM1_ESM.pdf]
